# Investigation of the roles of $\text{Ca}^{2+}$ and $\text{InsP}_3$ diffusion in the coordination of $\text{Ca}^{2+}$ signals between connected hepatocytes

Caroline Clair<sup>1</sup>, Cécile Chalumeau<sup>2</sup>, Thierry Tordjmann<sup>1</sup>, Josiane Poggioli<sup>2</sup>, Christophe Erneux<sup>3</sup>, Geneviève Dupont<sup>4</sup> and Laurent Combettes<sup>1</sup>

<sup>1</sup>INSERM U442, Université de Paris-Sud, bât 443, 91405 Orsay, France

<sup>2</sup>INSERM U356, IFR 58, Institut des Cordeliers, 15 rue de l'Ecole de Médecine, 75270 Paris, France

<sup>3</sup>Université Libre de Bruxelles, IRIBHN, Faculté de Médecine, Campus Erasme, Route de Lennik 808, B-1070 Brussels, Belgium

<sup>4</sup>Université Libre de Bruxelles, Faculté des Sciences CP231, Boulevard du Triomphe, B-1050 Brussels, Belgium

Author for correspondence (e-mail: laurent.combettes@ibaic.u-psud.fr)

Accepted 27 February 2001

Journal of Cell Science 114, 1999-2007 (2001) © The Company of Biologists Ltd

## SUMMARY

Glycogenolytic agonists induce coordinated  $\text{Ca}^{2+}$  oscillations in multicellular rat hepatocyte systems as well as in the intact liver. The coordination of intercellular  $\text{Ca}^{2+}$  signals requires functional gap-junction coupling. The mechanisms ensuring this coordination are not precisely known. We investigated possible roles of  $\text{Ca}^{2+}$  or inositol 1,4,5-trisphosphate ( $\text{InsP}_3$ ) as a coordinating messengers for  $\text{Ca}^{2+}$  spiking among connected hepatocytes. Application of ionomycin or of supra-maximal concentrations of agonists show that  $\text{Ca}^{2+}$  does not significantly diffuse between connected hepatocytes, although gap junctions ensure the passage of small signaling molecules, as demonstrated by FRAP experiments. By contrast, coordination of  $\text{Ca}^{2+}$  spiking among connected hepatocytes

can be favored by a rise in the level of  $\text{InsP}_3$ , via the increase of agonist concentrations, or by a shift in the affinity of  $\text{InsP}_3$  receptor for  $\text{InsP}_3$ . In the same line, coordination cannot be achieved if the  $\text{InsP}_3$  is rapidly metabolized by  $\text{InsP}_3$ -phosphatase in one cell of the multiplet. These results demonstrate that even if small amounts of  $\text{Ca}^{2+}$  diffuse across gap junctions, they most probably do not play a significant role in inducing a coordinated  $\text{Ca}^{2+}$  signal among connected hepatocytes. By contrast, coordination of  $\text{Ca}^{2+}$  oscillations is fully dependent on the diffusion of  $\text{InsP}_3$  between neighboring cells.

Key words: Calcium oscillations, Waves, Liver, Gap junctions

## INTRODUCTION

Fifteen years ago, it was shown in hepatocytes that the  $\text{Ca}^{2+}$  signals in response to hormonal stimulation generally consist of a series of peaks, also called oscillations, in intracellular  $\text{Ca}^{2+}$  ( $[\text{Ca}^{2+}]_i$ ) (Woods et al., 1986). The period of such oscillations varies between a few seconds and a few minutes, depending on the agonist concentration. Shortly after, it was observed that such sustained oscillations occur in isolated rat liver perfused with inositol 1,4,5-trisphosphate ( $\text{InsP}_3$ )-dependent agonists, suggesting some coordination between billions of hepatocytes constituting the liver (Graf et al., 1987). Since then, progress in fluorescence microscopy has revealed that each  $\text{Ca}^{2+}$  peak is spatially organized at the single cell level:  $\text{Ca}^{2+}$  concentration first increases locally, then the increase propagates throughout the whole cell as a kind of wave, travelling at a speed of 10-20  $\mu\text{m s}^{-1}$  (Rooney et al., 1990; Thomas et al., 1996). Moreover, studies in more highly integrated systems that preserved the functional integrity of the intact tissue, such as sections of cerebral tissue, preparations of intact retina, intestinal crypts and isolated intact perfused livers, showed that these intracellular movements of  $\text{Ca}^{2+}$  may be propagated from cell to cell,

creating an apparent intercellular wave (Dani et al., 1992; Newman and Zahs 1997; Lindqvist et al., 1998; Nathanson et al., 1995; Robbgaspers and Thomas 1995; Motoyama et al., 1999; reviewed by Tordjmann et al., 2000). Thus, the propagation of  $\text{InsP}_3$ -dependent intercellular  $\text{Ca}^{2+}$  waves provides a mechanism to coordinate the activity of a large number of cells (Eugenin et al., 1998).

In the liver, coordinated intercellular  $\text{Ca}^{2+}$  waves were first observed in doublets or triplets of freshly isolated hepatocytes (Nathanson and Burgstahler, 1992; Combettes et al., 1994), and have more recently been demonstrated in the isolated intact perfused liver (Nathanson et al., 1995; Robbgaspers and Thomas 1995; Motoyama et al., 1999; Patel et al., 1999). It is well known that cells in a tissue may communicate directly via gap junctions (the 'junctional coupling' pathway) or indirectly via a chemical messenger that is released by the cell into the extracellular medium, where it stimulates a target cell (paracrine pathway). Intercellular  $\text{Ca}^{2+}$  waves may be propagated via one or both of these pathways. For example, hepatocytes can communicate both through gap junctions (Saez et al., 1989) and via paracrine factors such as ATP (Schlosser et al., 1996). However, numerous results obtained on isolated multicellular systems of rat hepatocytes (doublets

or triplets of cells tightly connected by gap junctions) argue against a role for the paracrine pathway in the propagation and the coordination of the intercellular  $\text{Ca}^{2+}$  waves. Indeed, propagation of  $\text{Ca}^{2+}$  waves between isolated hepatocytes or among connected hepatocytes within multiplsets following mechanical stimulation of one cell disappears as soon as the preparation is perfused (Schlosser et al., 1996; Tordjmann et al., 1997). By contrast, perfusion of  $\text{InsP}_3$ -dependent agonists such as vasopressin or noradrenaline induces coordinated intercellular  $\text{Ca}^{2+}$  waves that are inhibited by selectively blocking gap-junction coupling (Nathanson and Burgstahler, 1992; Tordjmann et al., 1997). Thus, it is clear that functional gap junctions are fundamental to ensure the coordination of these  $\text{Ca}^{2+}$  signals. However, the mechanisms ensuring this coordination are not precisely known and are still a matter of debate (Höfer, 1999; Dupont et al., 2000).

$\text{Ca}^{2+}$  and  $\text{InsP}_3$  are the two most likely candidates for the intercellular messenger involved in the propagation and coordination of intercellular  $\text{Ca}^{2+}$  waves in connected hepatocytes. It has been shown, especially in doublets of hepatocytes, that  $\text{Ca}^{2+}$  ions and  $\text{InsP}_3$  can spread from one cell to another through gap junctions (Saez et al., 1989; Niessen and Willecke, 2000; reviewed by Sanderson et al., 1994). Moreover, both second messengers are thought to induce an 'autocatalytic' increase in  $[\text{Ca}^{2+}]_i$  (reviewed by Taylor, 1998). In fact, in a large number of different cultured cell types, it has been shown that propagation of  $\text{Ca}^{2+}$  waves induced by mechanical stimulation of one cell probably relies on the progressive diffusion of the  $\text{InsP}_3$ , massively synthesized in the stimulated cell, to its neighbors (Sanderson, 1995; Sneyd et al., 1995). However, experimental results obtained in multiplsets of connected hepatocytes suggest that such a mechanism cannot account for the coordination of apparent intercellular  $\text{Ca}^{2+}$  waves in these cells. The main difference between hepatocytes and the other tissues is that, although gap-junction permeability is essential for coordinating  $\text{Ca}^{2+}$  oscillations in the coupled cells, each hepatocyte needs to be stimulated to display  $\text{Ca}^{2+}$  oscillations. Focal stimulation of one cell within a doublet by submaximal concentrations of  $\text{InsP}_3$ -dependent agonists, such as vasopressin or noradrenaline, does not induce a  $\text{Ca}^{2+}$  increase in the adjacent cells (Tordjmann et al., 1997). Two recent independent studies using different mathematical models propose that intercellular  $\text{Ca}^{2+}$  waves arise because each individual hepatocyte in multiplsets displays repetitive  $\text{Ca}^{2+}$  spikes with a slight phase-shift with respect to neighboring cells; both studies emphasize the crucial role of gap-junction coupling to coordinate these  $\text{Ca}^{2+}$  spikes (Höfer, 1999; Dupont et al., 2000). However, whereas it is suggested in the first model that synchronization requires gap-junctional diffusion of cytosolic  $\text{Ca}^{2+}$  (Höfer, 1999), it is proposed in the other model that  $\text{Ca}^{2+}$  spikes are coordinated by the junctional diffusion of small amounts of  $\text{InsP}_3$  (Dupont et al., 2000). In the present experimental study, the purpose was to determine the respective roles of  $\text{Ca}^{2+}$  and  $\text{InsP}_3$  in the coordination of  $\text{Ca}^{2+}$  oscillations in hepatocytes. Experiments were performed on doublets and triplets of hepatocytes, which are real fragments of the liver cell plate. Our results indicate that gap-junctional diffusion of  $\text{InsP}_3$  plays a key role in the coordination of  $\text{Ca}^{2+}$  signals among connected hepatocytes.

## MATERIALS AND METHODS

BAPTA-Dextran, calcein/AM, Fura2, Fura2/AM and  $\text{Ca}^{2+}$ -orange/AM were obtained from Molecular Probes Inc. and Fura2PE3 from Teflab. William's medium E was from GIBCO, ionomycin was from Calbiochem, and collagenase from Boehringer. All other chemicals were purchased from Sigma and were of the highest grade available commercially.

### Preparation of hepatocytes

Isolated rat hepatocytes were prepared from fed female Wistar rats by limited collagenase digestion of rat liver, as previously described (Combettes et al., 1994). In these conditions, about 20% cells were associated by two (doublet) or three (triplet) and were distinguished from aggregates of non-connected cells in conventional light microscopy by screening for dilated bile canaliculi, indicators of maintained functional polarity (Gautam et al., 1987). After isolation, rat hepatocytes were maintained ( $5 \times 10^5$  cells/ml) at  $4^\circ\text{C}$  in Williams' medium E supplemented with 10% foetal calf serum, penicillin (100,000 units/ml) and streptomycin (100  $\mu\text{g}/\text{ml}$ ). Cell viability, assessed by trypan blue exclusion, remained greater than 96% for 4-5 hours.

### Measurement of intracellular $\text{Ca}^{2+}$ in individual cells

#### Loading of hepatocytes with fura2

Hepatocytes were loaded with fura2, as previously described (Tordjmann et al., 1997), either by injection (see below) or by incubation with the dye. Small aliquots of the suspended hepatocytes ( $5 \times 10^5$  cells) were diluted in 2 ml of Williams' medium E modified as described above, then plated onto dish glass coverslips coated with collagen I, and incubated for 60 minutes at  $37^\circ\text{C}$  under an atmosphere containing 5%  $\text{CO}_2$ . After cell plating, the medium was removed and replaced with a medium containing 3  $\mu\text{M}$  fura2/AM or fura2PE3/AM for 30 minutes at  $37^\circ\text{C}$  under an atmosphere containing 5%  $\text{CO}_2$ . The coverslips were then washed twice with a saline solution (20 mM HEPES, 116 mM NaCl, 5.4 mM KCl, 1.8 mM  $\text{CaCl}_2$ , 0.8 mM  $\text{MgCl}_2$ , 0.96 mM  $\text{NaH}_2\text{PO}_4$ , 5 mM  $\text{NaHCO}_3$ , and glucose 1 g/l, pH 7.4). Dish coverslips were put onto a thermostated holder ( $34^\circ\text{C}$ ) on the stage of a Zeiss Axiovert 35 microscope set up for epifluorescence microscopy.

#### Microinjection

Microinjection was performed using an Eppendorf microinjector (5242), as described previously (Tordjmann et al., 1997). Micropipettes with an internal tip diameter of 0.5  $\mu\text{m}$  (Femtotips, Eppendorf) were filled with test agents together with 5 mM fura2 in a buffer solution containing 100 mM KCl, 20 mM NaCl, 10 mM Hepes adjusted to pH 7.1. After microinjection, cells were allowed to recover for at least 10 minutes. The success of microinjection was assessed by monitoring the morphology of cells before and after manipulation and checking the ability of the cell to retain injected fura2 and low  $[\text{Ca}^{2+}]_i$ . Purification and determination of activity of the recombinant type I  $\text{InsP}_3$  5-phosphatase (19  $\mu\text{mol}/\text{minute}/\text{ml}$  in this study) was performed as described previously (Communi et al., 1996; De Smedt et al., 1997).  $\text{InsP}_3$  5-phosphatase was inactivated at  $90^\circ\text{C}$  for 20 minutes. Cells were microinjected either with inactivated  $\text{InsP}_3$  5-phosphatase or with  $\text{InsP}_3$  5-phosphatase (activity: 120 nmol/min/ml in the pipette) as described above.

#### Determination of $[\text{Ca}^{2+}]_i$ changes in hepatocytes

$\text{Ca}^{2+}$  imaging was as described previously (Tordjmann et al., 1997). Briefly, the excitation light was supplied by a high pressure xenon arc lamp (75 watt), and the excitation wavelengths were selected by 340 and 380 nm filters (10 nm bandwidth) mounted in a processor-controlled rotating filter wheel (Sutter, Novato, CA) between the UV

lamp and the microscope. Fluorescence images were collected either by a low-light level ISIT camera (Lhesa Électronique, Cergy Pontoise, France) or a CCD camera (Princeton Instruments, Evry, France), digitized and integrated in real time by an image processor (Metaflour, Princeton Instruments).

#### Simultaneous determination of gap-junction permeability and [Ca<sup>2+</sup>]<sub>i</sub> changes in hepatocyte multiplets

Gap-junction permeability was determined in hepatocyte multiplets using fluorescence recovery after photobleaching (FRAP). These experiments were performed on an inverted confocal microscope (Zeiss, LSM510) using the fluorescent tracer calcein, a low molecular weight (623 Da) fluorescent dye that has been previously reported to be an effective marker for gap-junction communication (Tomasetto et al., 1993; Jacobi et al., 1998). To avoid cell injury, this fluorescent compound can be loaded into cultured cells in its esterified form, calcein/AM. [Ca<sup>2+</sup>]<sub>i</sub> changes were followed with the fluorescent Ca<sup>2+</sup>-sensitive dye Ca<sup>2+</sup>-orange. Because the excitation and emission characteristics of calcein ( $\lambda_{\text{ex}}=494$  nm;  $\lambda_{\text{em}}=520$  nm) do not significantly overlap with those of Ca<sup>2+</sup>-orange ( $\lambda_{\text{ex}}=546$  nm;  $\lambda_{\text{em}}=580$  nm), both the [Ca<sup>2+</sup>]<sub>i</sub> and the spread of calcein can be simultaneously evaluated. Thus, hepatocytes were incubated with calcein/AM (3  $\mu$ M) and Ca<sup>2+</sup>-orange/AM (5  $\mu$ M) for 20 minutes at 37°C. Cells were then washed three times and incubated for 10–20 minutes to allow complete ester hydrolysis. Calcein and Ca<sup>2+</sup>-orange fluorescence were then observed at 520 nm and 580 nm, respectively, after excitation was provided by the 488 nm and the 546 nm lines of a krypton/argon laser. The AOTF system of the Zeiss confocal microscope allows use of the same Argon-Krypton laser to both image and bleach the fluorescence in numerous cells of interest. After baseline fluorescence images were obtained at each wavelength, agents were added and change in [Ca<sup>2+</sup>]<sub>i</sub> was monitored on line by following the change in Ca<sup>2+</sup>-orange fluorescence (see Fig. 3). Then, the fluorescence emitted by calcein was bleached by exposure of a given cell to high (100%) intensity laser light (488 nm) close to the calcein excitation maximum (494 nm). Complete or almost complete photobleaching was achieved after 30 scans for a total duration of 15 seconds (Fig. 3). Recovery of fluorescence in the bleached cell was monitored for 8 minutes. After correction and normalization, fluorescence was plotted over time to generate fluorescence recovery curves which were fitted to an exponential function using a scientific plotting program (Origin, MicroCal). Analysis allow us to obtain two values: the degree of recovery (%) and the rate of recovery.

## RESULTS AND DISCUSSION

### Investigation of the possible role of Ca<sup>2+</sup> as a coordinating messenger for Ca<sup>2+</sup> spiking among connected hepatocytes

Previous reports using microinjected Ca<sup>2+</sup> suggest that this messenger diffuses through gap junctions in hepatocyte doublets (Saez et al., 1989). However little information is available on the ability of Ca<sup>2+</sup> to pass through gap junctions under less invasive techniques and/or more physiological stimulation. In a previous study, we have shown that focal stimulation of one hepatocyte of a doublet with a low agonist concentration induced Ca<sup>2+</sup> oscillations that were restricted to the stimulated cell (Tordjmann et al., 1997). The latter results suggest either that Ca<sup>2+</sup> was not able to diffuse through gap junctions under these conditions or that the change in Ca<sup>2+</sup> associated fluorescence was too low to be detected. In the present study, we first aimed to further investigate if Ca<sup>2+</sup> can flow through hepatic gap junctions under physiological

conditions. For this purpose, single-cell stimulation was performed either by a focal application from a glass micropipette filled with ionomycin (500 nM) or by a global perfusion of maximal agonists concentrations. In both types of experiments, fura2 loading was performed by microinjection of the dye in one cell, fura2 diffusion via gap junctions ensuring that the two cells were efficiently coupled.

#### Focal application of ionomycin

Focal application of ionomycin was achieved by positioning a glass micropipette close to the cell of interest and applying a constant pressure via the Eppendorf injector, delivering picoliter quantities of ionomycin-containing solution (500 nM). As shown in Fig. 1 (left panel), the ionomycin-microperfused cell exhibited a rapid and high [Ca<sup>2+</sup>]<sub>i</sub> rise; by contrast, [Ca<sup>2+</sup>]<sub>i</sub> remained at a basal low level in the non-microperfused cell. However, after ionomycin was washed away, global perfusion of noradrenaline (1  $\mu$ M) induced well coordinated [Ca<sup>2+</sup>]<sub>i</sub> oscillations within the two cells (right panel).

#### Global application of supra-maximal agonists concentrations

In these experiments, one of two connected hepatocytes was injected with fura2 and heparin. Heparin inhibits both InsP<sub>3</sub> binding and the resulting InsP<sub>3</sub>-induced Ca<sup>2+</sup> release (Worley et al., 1987; Cullen et al., 1988). As shown in Fig. 2, which is representative of 10 doublets, perfusion of maximal concentrations of vasopressin (10 nM) or noradrenaline (10  $\mu$ M) elicited an immediate Ca<sup>2+</sup> rise in the non-injected cells, which was maintained at a high level for at least 3 minutes, especially in the presence of vasopressin (Fig. 2B), whereas no change of fluorescence was observed in the heparin-injected cell. By contrast, addition of thapsigargin or ionomycin induced a [Ca<sup>2+</sup>]<sub>i</sub> increase in the two connected cells (data not shown).

#### Gap-junctional conductivity during agonist stimulation

The two previous results (sections A and B) show that [Ca<sup>2+</sup>]<sub>i</sub> remains at a basal level even when Ca<sup>2+</sup> is high in any of the connected hepatocytes. Why did Ca<sup>2+</sup> not significantly diffuse from one cell to the other? Is it because diffusion of Ca<sup>2+</sup> within the cytosol is weak (Allbritton et al., 1992) or rather to a weak gap-junctional communication under the conditions of stimulation used in the latter experiments? It is well known that gap junctions are sensitive to Ca<sup>2+</sup> increases (Lowenstein, 1981; De Mello, 1994; Spray et al., 1994), and it has even been suggested that, in an hepatoma cell line, gap-junction permeability is attenuated at Ca<sup>2+</sup> concentrations as low as 500 nM (Lazrak and Peracchia, 1993). Moreover, it has been shown in different cells types, such as astrocytes, hippocampal neurons, the ciliary epithelium of the eye or pancreatic acinar cells, many different agonists can modulate gap-junction permeability (Giaume and McCarthy, 1996; Yule et al., 1996; Stelling and Jacob, 1997; Chanson et al., 1999). Thus, InsP<sub>3</sub>-dependent Ca<sup>2+</sup> agonists could affect gap-junction permeability in hepatocytes.

To investigate this possibility, gap-junction permeability was quantified in dying hepatocyte doublets using FRAP in the presence or absence of high agonist concentrations. This technique has the advantage over other methods to be relatively

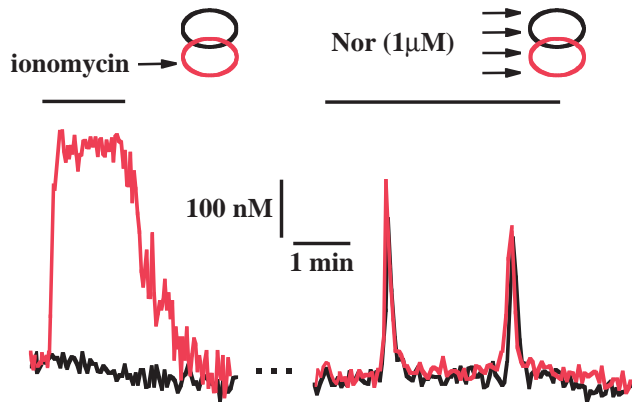

**Fig. 1.** Focal application of ionomycin to connected rat hepatocytes. Hepatocytes were injected with fura2. The two parts of the figure show successive measures of  $[Ca^{2+}]_i$  in the same hepatocyte doublet and are representative of those obtained using 4 doublets in 3 independent experiments. The first part of the figure shows the  $Ca^{2+}$  response when one cell within the doublet was focally microperfused with ionomycin (500 nM in the micropipette) for the time shown by the upper horizontal bars. In these conditions, only the stimulated cell (indicated by arrow) within the doublet responded. Following ionomycin wash out, global superfusion of the doublet with noradrenaline (1  $\mu$ M) induced tightly coordinated  $[Ca^{2+}]_i$  oscillations in both cells. For technical convenience, tracings were interrupted (the gap represents 3 minutes).

non-invasive and quantitative. Indeed, when cells are loaded with a low molecular weight fluorescent probe ( $\leq 1$  kDa), the recovery of fluorescence in the bleached target cell will reflect the influx of dye from the connected unbleached cells (Wade et al., 1986; Meyvis et al., 1999). Then, the rate of refill is a measure of gap-junction permeability. In the present study, hepatocytes were loaded with calcein, a low molecular weight (623 Da) fluorescent dye that has been previously reported to be an effective marker for gap-junction communication (Tomasetto et al., 1993; Jacobi et al., 1998) and  $Ca^{2+}$ -orange as an intracellular  $Ca^{2+}$  indicator. A representative confocal image of an hepatocyte doublet loaded with calcein and  $Ca^{2+}$ -orange is shown in Fig. 3C.

First, the baseline fluorescence of a doublet was obtained simultaneously for each dye by confocal microscopy (see Materials and Methods). After about 30 seconds, a maximal concentration of agonist was perfused. As revealed by the fluorescence increase of  $Ca^{2+}$ -orange, perfusion of vasopressin (10 nM) induced, as usual, a sustained  $[Ca^{2+}]_i$  increase in the two cells (Fig. 3A). Then, as described in Materials and Methods, the fluorescence emitted by calcein was bleached in one cell (indicated as cell 2 in Fig. 3) by selectively exposing the latter cell to the full laser power at 488 nm. This resulted in the nearly complete ablation of the cell's calcein fluorescence (Fig. 3C,b; Fig. 3B, trace 2). Note that, in accordance with its excitation wavelength characteristic,  $Ca^{2+}$ -orange was not greatly affected by this strong illumination at 488 nm (Fig. 3C; Fig. 3A, trace 2). Subsequently, the microscope settings were returned to the recording configuration, and the refill was monitored (Fig. 3B). The fluorescence recovery was then plotted and fitted to an exponential function (Fig. 4), yielding two characteristic values: the degree (%) and the rate (seconds) of recovery. As

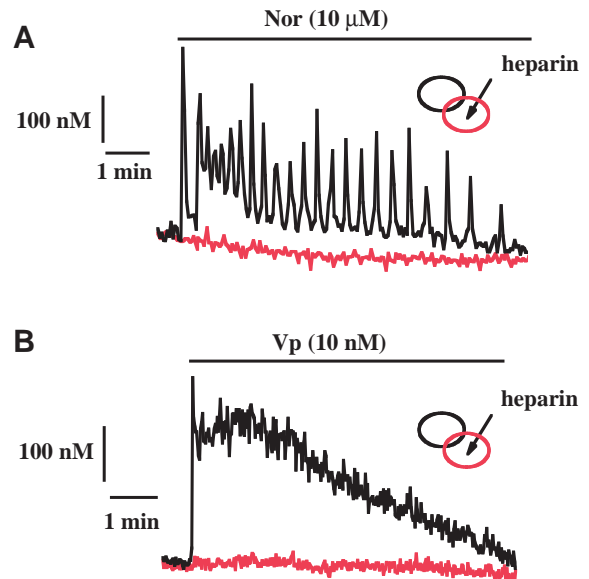

**Fig. 2.** Absence of apparent  $Ca^{2+}$  diffusion between connected rat hepatocytes. Hepatocyte doublets were injected with fura2 and heparin (10 mg/ml in the pipette) as described in methods section. After injection, perfusion (for the time shown by the horizontal bars) of high concentration of noradrenaline (Nor; 10  $\mu$ M, A) or vasopressin (Vp; 10 nM, B), induced a rapid and strong increase in  $[Ca^{2+}]_i$  in the noninjected cell only. Although this  $[Ca^{2+}]_i$  increase was maintained for more than 3 minutes in the responding cell, no diffusion of  $Ca^{2+}$  was observed in the connected cell injected with heparin. These results are representative of those obtained using 10 doublets in four independent experiments.

shown in Fig. 4 and summarized in Table 1, hepatocyte doublets from control experiments were extensively interconnected by gap junctions, as they showed a rapid and high degree of recovery. As expected for a gap-junction-dependent effect, octanol (0.5 mM) nearly totally blocked this refill (Fig. 4; Table 1). At this concentration of octanol, the effect of gap-junction cell coupling was reversible as octanol could be washed out and coupling restored (data not shown). By contrast, in vasopressin (10 nM)- or noradrenaline (10  $\mu$ M)-treated hepatocytes, we found that coupling was similar to control experiments, suggesting that stimulation with these maximal concentrations of agonists had no effect on gap-junction permeability (Table 1). Thus, it can be concluded that the passage of small signaling molecules is possible under conditions of physiological stimulation.

#### Are small amounts of $Ca^{2+}$ sufficient to coordinate $Ca^{2+}$ oscillations?

Together, these data suggest that, although  $Ca^{2+}$  can in principle flow through the gap junctions of connected hepatocytes, significant amounts of this messenger do not pass from one cell to the other. However, it has been proposed that a relatively small amount of  $Ca^{2+}$ , although undetectable by an increase in fluorescence, could be sufficient to account for the synchronization of  $Ca^{2+}$  oscillations via a  $Ca^{2+}$ -induced  $Ca^{2+}$  release mechanism (Ngezahayo and Kolb, 1993; Höfer, 1999). In an attempt to confirm or invalidate such a hypothesis in hepatocytes, we tried to abolish any  $Ca^{2+}$  movements in the intermediate cell of a triplet by injecting BAPTA in this cell to

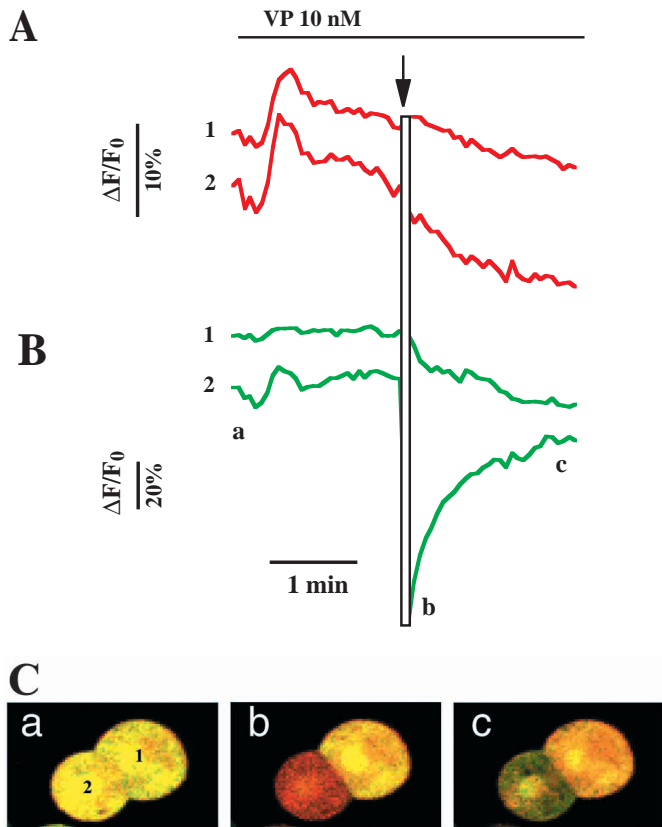

**Fig. 3.** Simultaneous determination of gap-junction permeability and [Ca<sup>2+</sup>]<sub>i</sub> increase in hepatocyte doublets. Hepatocytes loaded with calcein and Ca<sup>2+</sup>-orange were imaged by confocal microscopy (as described in Materials and Methods) and appear brightly fluorescent (C). Panel A shows the time course of vasopressin (Vp) induced [Ca<sup>2+</sup>]<sub>i</sub> increase in a doublet of hepatocytes observed at 580 nm using Ca<sup>2+</sup>-orange excited at 546 nm. Simultaneous determination at 520 nm of calcein fluorescence excited at 488 nm is shown in B (note that traces have been shifted for clarity). In contrast to Ca<sup>2+</sup>-orange, the small molecular weight of calcein allows it to diffuse freely across gap junctions so that gap-junction permeability can be evaluated by fluorescence recovery after photobleaching (FRAP). Basal fluorescence level of the two dyes was measured for 30 seconds. Then perfusion of Vp (10 nM) induced a rapid and maintained [Ca<sup>2+</sup>]<sub>i</sub> increase in both cells of the doublet (A). After about 1 minute the cell indicated as cell 2 was bleached by focused 100% intensity laser excitation at 488 nm for 15 seconds (arrows and open box). Subsequently, the cell's fluorescence recovered by diffusion of unbleached dye from the adjacent cell through the gap junctions (B, traces 1 and 2; see C). Note that fluorescence of Ca<sup>2+</sup>-orange was slightly affected by photobleaching, as indicated by the small decrease in fluorescence intensity observed at 580 nm (panel A, trace 2) and the fact that the photobleached cell appeared greener after recovery (C, c). Panel C shows a merged image of a doublet of hepatocytes loaded with calcein and Ca<sup>2+</sup>-orange before (a), immediately (b) and about 2 minutes after photobleach (c). Cell 2 was photobleached as described above.

see if coordination of Ca<sup>2+</sup> signals was affected. However, as expected from its low molecular weight, BAPTA was able to spread from the injected cell to the other connected cells (data not shown) and the concentration of BAPTA-Dextran (10 kDa) that could reach the cell after injection (100-200 μM) was not

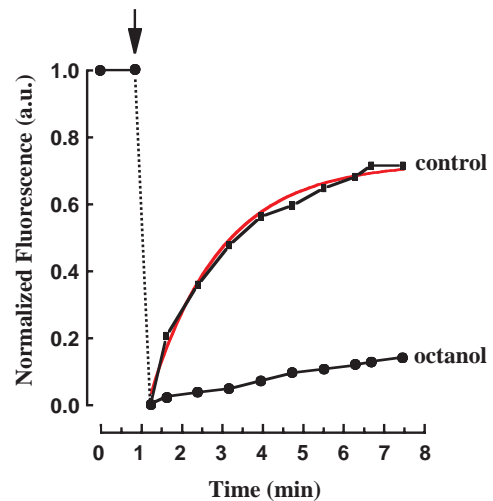

**Fig. 4.** Hepatocyte gap junctions remain open during InsP<sub>3</sub>-dependant agonists stimulation. Typical calcein fluorescence recovery analysis. Each curve was normalized and then fitted to an exponential function (red line) as described in Materials and Methods. Analysis allowed us to obtain two values: the degree of recovery (%) and the rate of recovery (τ). As shown here, recovery was large (>60%) and rapid (τ≈100 seconds) in the control experiment. By contrast, octanol reduced almost totally the fluorescence recovery after photobleach.

**Table 1. Assessment of hepatocyte gap-junction permeability**

|                           | Recovery % | t <sub>1/2</sub> seconds |
|---------------------------|------------|--------------------------|
| Control n=49              | 64±2       | 105±6                    |
| Vasopressin (10 nM) n=14  | 56±3       | 84±11                    |
| Noradrenaline (10 μM) n=8 | 76±10      | 81±14                    |
| 8Bromo-cAMP (10 μM) n=16  | 64±4       | 100±12                   |
| Octanol (500 μM) n=3      | 11±3       | ND                       |

In contrast with octanol, neither noradrenaline nor vasopressin at maximal concentrations affects significantly the permeability of the gap junctions to the calcein. Data are the mean±s.e.m. ND, not done.

sufficient to completely block vasopressin or noradrenaline-induced Ca<sup>2+</sup> increase in those cells (data not shown). Thus, it was not possible to directly estimate in the latter conditions whether Ca<sup>2+</sup> is involved in the coordination of Ca<sup>2+</sup> oscillations.

Nevertheless, it should be remembered that coordination could extend across an intermediate cell in which the release of intracellular Ca<sup>2+</sup> was inhibited by heparin, at least for the first few spikes following stimulation (Tordjmann et al., 1997). This suggests that an increase in Ca<sup>2+</sup> is not crucial for the coordination of Ca<sup>2+</sup> oscillations.

### Investigation of the possible role of InsP<sub>3</sub> as a coordinating messenger for Ca<sup>2+</sup> spiking among connected hepatocytes

Ca<sup>2+</sup> signals in response to increasing agonist concentrations

The other likely candidate that could be responsible for the coordination of Ca<sup>2+</sup> spiking among connected hepatocytes is InsP<sub>3</sub>. If junctional InsP<sub>3</sub> diffusion is involved, it can be

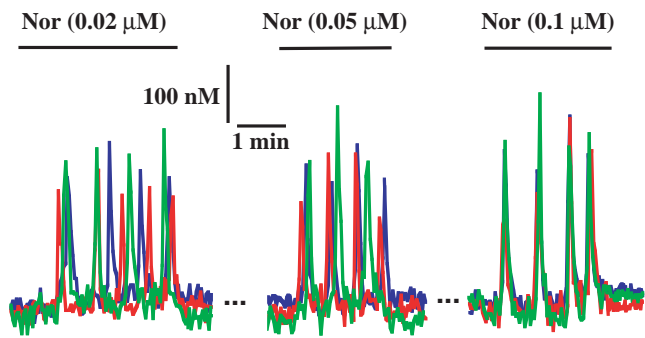

**Fig. 5.** Coordination of  $\text{Ca}^{2+}$  oscillations increase with the increase of agonist concentration in connected hepatocytes. Hepatocytes were loaded or injected with fura2. The figures show successive measures of  $[\text{Ca}^{2+}]_i$  in the same hepatocyte triplet. Cells were sequentially stimulated with increasing concentrations of noradrenaline (0.02, 0.05 and 0.1  $\mu\text{M}$ ) for the time shown by the horizontal bars. Addition of the lowest dose of noradrenaline to the bath was followed by oscillations in the three cells that were not coordinated (left). After washing, addition of a higher concentration of noradrenaline (0.05  $\mu\text{M}$ ) induced coordinated  $\text{Ca}^{2+}$  oscillations (middle part). Finally, very well coordinated oscillations were observed in the presence of 0.1  $\mu\text{M}$  noradrenaline (right). The same results were obtained in hepatocyte doublets and are representative of those obtained using 12 triplets and 21 doublets in five independent experiments. Recording of the traces was interrupted during the washing process (5 minutes).

expected that the degree of coupling increases with the level of  $\text{InsP}_3$ , and thus also with the concentration of the agonist. To test this hypothesis, hepatocyte multiplets were perfused with increasing concentrations of  $\text{InsP}_3$ -dependent agonists (Fig. 5). Note that the proportion of responsive cells in these conditions was low (30–50%). Nevertheless, application of very low concentrations of noradrenaline (0.02  $\mu\text{M}$ ), to doublet or triplet of hepatocytes sometimes induced  $\text{Ca}^{2+}$  oscillations (Fig. 5 and data not shown). However, these oscillations were not coordinated, as if the cells were not functionally coupled by gap junctions (each cell having its own oscillation frequency) even though gap junctions efficiently connected these cells as they were loaded by cell to cell diffusion of microinjected fura2. Raising the concentration of noradrenaline (0.05  $\mu\text{M}$ ) not only increased the frequency of the  $\text{Ca}^{2+}$  oscillations as expected (see blue and green traces in Fig. 5 for example), but also led to coordinated oscillations (Fig. 5, middle panel). Finally, perfusion of a higher concentration of noradrenaline (0.1  $\mu\text{M}$ ) induced a good coordination of the  $\text{Ca}^{2+}$  oscillations among the connected hepatocytes. Because, in contrast with the amplitude of  $\text{Ca}^{2+}$  oscillations, the  $\text{InsP}_3$  level increases with increasing concentrations of agonists (Thomas et al., 1991; Thomas et al., 1996), these results suggest that  $\text{InsP}_3$ , rather than  $\text{Ca}^{2+}$ , is responsible for the coordination of  $\text{Ca}^{2+}$  oscillations between connected hepatocytes. At low stimulation, production of  $\text{InsP}_3$  is indeed too small to allow for an efficient junctional  $\text{InsP}_3$  diffusion, and the cells thus oscillate at their own intrinsic frequencies; raising the level of  $\text{InsP}_3$ , via the increase of agonist concentrations, allows the diffusion of significant amounts of  $\text{InsP}_3$  through gap junctions, a phenomenon that can account for the observed coordination in  $\text{Ca}^{2+}$  oscillations (Dupont et al., 2000).

### Coordination of $\text{Ca}^{2+}$ signals after sensitization of the $\text{InsP}_3\text{Rs}$

We used an other approach to validate the latter mechanism of coordination. Our approach was to act on the affinity of the  $\text{InsP}_3$  receptors ( $\text{InsP}_3\text{R}$ ) for  $\text{InsP}_3$ . This was achieved with the use of thimerosal and cAMP, as both are known to increase the affinity of the  $\text{InsP}_3\text{R}$  to  $\text{InsP}_3$ . Indeed, in many cell types and notably in hepatocytes, numerous studies have shown that the affinity of the  $\text{InsP}_3\text{R}$  for  $\text{InsP}_3$  increased in the presence of cAMP (Burgess et al., 1991; Bird et al., 1993; Joseph and Ryan, 1993; Hajnoczky et al., 1993). This effect results from the ability of the cAMP-dependent protein kinase to phosphorylate the three types of  $\text{InsP}_3$  receptors (Wojcikiewicz and Luo, 1998).

As described previously,  $\text{InsP}_3$ -dependent agonists at low concentration induced uncoordinated  $\text{Ca}^{2+}$  oscillations among connected hepatocytes (Fig. 6, left panels). However, when cells were incubated with 8Bromo-cAMP (10  $\mu\text{M}$ ) for 5 minutes we observed that, in 70% of all the multiplets analyzed (15 doublets and 8 triplets), re-addition of the same low concentration of vasopressin or noradrenaline, induced well-coordinated  $[\text{Ca}^{2+}]_i$  oscillations (Fig. 6A and data not shown). This suggest that in these conditions, the small quantity of  $\text{InsP}_3$  diffusing through gap junctions was sufficient to coordinate  $\text{Ca}^{2+}$  oscillations. Alternatively, it has been shown that cAMP can increase the permeability of gap junctions (Loewenstein, 1985; Burghardt, 1995), an effect that could account for coordination of  $\text{Ca}^{2+}$  signals. Although the concentration of 8Bromo-cAMP required to increase gap-junction permeability is usually higher (0.1–1 mM) than that used in this study (10  $\mu\text{M}$ ), this hypothesis has been checked. Gap-junction permeability was quantified using FRAP in dying hepatocytes doublets incubated for 5 minutes with or without 8Bromo-cAMP (10  $\mu\text{M}$ ). Results are summarized in Table 1 and show that gap-junction permeability was not significantly affected by 8Bromo-cAMP. Thus, the cAMP-induced increase in the degree of coordination of  $\text{Ca}^{2+}$  oscillations observed at low levels of stimulation might result from the shift in the sensitivity of the  $\text{InsP}_3\text{R}$ .

These results were confirmed with the use of the thiol reagent thimerosal. This compound is known to increase the sensitivity of the  $\text{InsP}_3\text{R}$  to  $\text{InsP}_3$ , especially in hepatocytes (Missiaen et al., 1992; Bird et al., 1993; Hilly et al., 1993). In agreement with previous observations (Green et al., 1999), application of 1  $\mu\text{M}$  thimerosal to fura2-loaded hepatocytes did not elevate  $\text{Ca}^{2+}$  by itself but induced a slight rise in the frequency of noradrenaline-induced  $\text{Ca}^{2+}$  oscillations (Fig. 6B). More interestingly, in the majority of multiplets (5/8 doublets and 3/5 triplets), noradrenaline-induced  $\text{Ca}^{2+}$  oscillations that were uncoordinated in the absence of thimerosal, became well coordinated after co-application of thimerosal (Fig. 6B). In most cases, coordination was maintained during the first few peaks (Fig. 6B, upper traces), but in some doublets coordination remained for much longer periods of time (Fig. 6B, lower traces).

Thus, both cAMP and thimerosal significantly increased the level of coordination of  $\text{Ca}^{2+}$  spiking between connected hepatocytes at low agonist concentrations. Our interpretation of the latter results is that a shift in the affinity of the  $\text{InsP}_3\text{Rs}$  for  $\text{InsP}_3$  potentiates the coordinating effect of the small amounts of  $\text{InsP}_3$  flowing through gap junctions. It should be

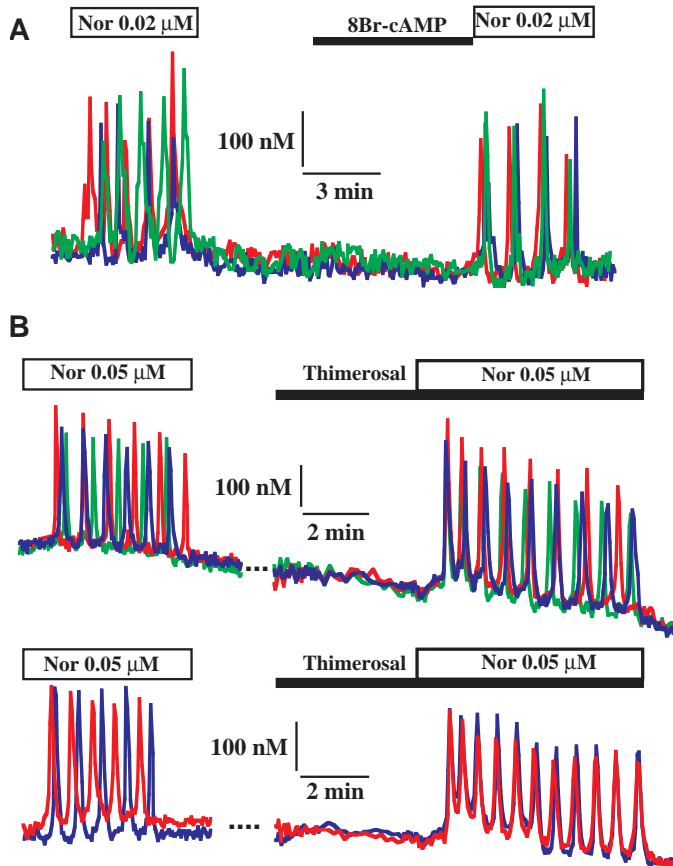

**Fig. 6.** Increase in *InsP<sub>3</sub>* receptor sensitivity induces coordination of Ca<sup>2+</sup> oscillations in connected hepatocytes. Hepatocyte multiplets were loaded with fura2. Addition of a low concentration of noradrenaline (0.02 μM, A; 0.05 μM, B) for the time shown by the open box induced uncoordinated Ca<sup>2+</sup> oscillations. However, when the same cells were incubated in the presence of 8Bromo-cAMP (10 μM, for the time shown by the black box; A), or when noradrenaline was perfused in the presence of thimerosal (10 μM, for the time shown by the black box; B), the same dose of noradrenaline elicited coordinated Ca<sup>2+</sup> oscillations. The same results were obtained in hepatocyte doublets and are representative of those obtained using 7 triplets and 12 doublets in four independent experiments. For technical reasons, recording of the traces was interrupted during the washing process (3 minutes) and frame pairs were captured every 10 seconds during a part of thimerosal perfusion.

emphasized that the increase in coordination by cAMP and thimerosal would not be predicted by a model based on Ca<sup>2+</sup> diffusion through gap junctions, as the amplitude of Ca<sup>2+</sup> oscillations does not depend on the presence of cAMP or thimerosal.

#### Effect of the increase of *InsP<sub>3</sub>* 5-phosphatase activity in hepatocytes

Finally, we have studied the role of a putative *InsP<sub>3</sub>* intercellular diffusion in synchronization of Ca<sup>2+</sup> oscillations by microinjection of type I *InsP<sub>3</sub>* 5-phosphatase in the intermediate cell of a triplet. Type I *InsP<sub>3</sub>* 5-phosphatase is the most widespread *InsP<sub>3</sub>* 5-phosphatase and efficiently metabolizes *InsP<sub>3</sub>* to produce inositol 1,4-bisphosphate, which does not mobilize Ca<sup>2+</sup> (Putney et al., 1989; Erneux et al.,

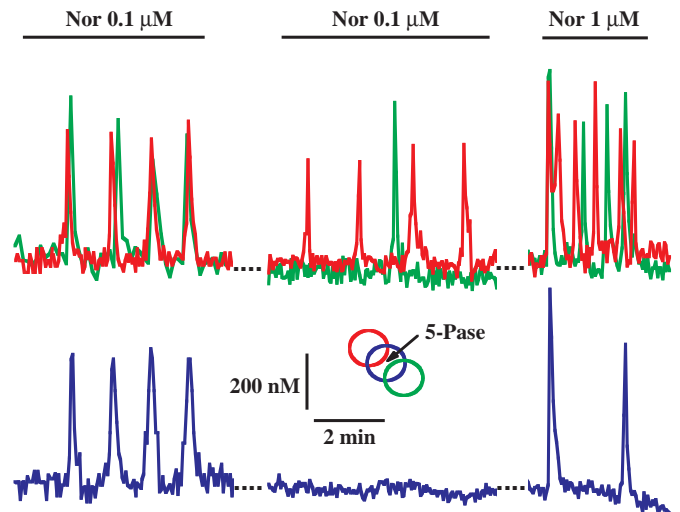

**Fig. 7.** *InsP<sub>3</sub>* 5-phosphatase prevents coordination of Ca<sup>2+</sup> oscillations induced by *InsP<sub>3</sub>*-dependent agonists in connected hepatocytes. Hepatocyte triplets loaded or injected with fura2 were challenged with noradrenaline (0.1 μM and 1 μM) for the time shown by horizontal bars. Tracings, representing [Ca<sup>2+</sup>]<sub>i</sub> in the three connected cells, have been shifted arbitrarily along the y-axis for clarity. For technical convenience, tracings were interrupted but left, middle and right parts of the figure show successive measurement of [Ca<sup>2+</sup>]<sub>i</sub> in the same hepatocyte triplet. In the left part, noradrenaline addition to the bath was followed by coordinated [Ca<sup>2+</sup>]<sub>i</sub> oscillations. The intermediate cell of the triplet was then injected with *InsP<sub>3</sub>* 5-phosphatase, as described in Materials and Methods. After injection (middle), application of noradrenaline did not elevate [Ca<sup>2+</sup>]<sub>i</sub> in the injected cell. By contrast, noradrenaline still elicited Ca<sup>2+</sup> oscillations, but these oscillations were not coordinated at all. Finally, at the end of the experiment, the same triplet was challenged with a higher concentration of noradrenaline (1 μM), which elicited a Ca<sup>2+</sup> response in the three connected cells (right). Note the oscillatory pattern for the *InsP<sub>3</sub>* 5-phosphatase injected cell. These results are representative of those obtained using 9 triplets in three independent experiments.

1989; Verjans et al., 1994). It has been shown recently that over-expression of this enzyme in CHO cells deeply affected the pattern of Ca<sup>2+</sup> oscillations; in some cases it even abolished the stimulus-induced Ca<sup>2+</sup> signal (De Smedt et al., 1997). In the present study, we thus used microinjected *InsP<sub>3</sub>* 5-phosphatase to specifically decrease the level of *InsP<sub>3</sub>* in a particular hepatocyte. Triplets were first loaded with fura2 and treated with noradrenaline (0.1 μM), which elicited trains of coordinated Ca<sup>2+</sup> oscillations in the three connected cells (Fig. 7, left panel). After washing out noradrenaline, the intermediate cells of the triplets were microinjected with *InsP<sub>3</sub>* 5-phosphatase, as described in Materials and Methods. In the vast majority of injected multiplets (9/13), the renewed superfusion of noradrenaline (0.1 μM) elicited Ca<sup>2+</sup> oscillations in the non-injected cells only, whereas Ca<sup>2+</sup> remained at a low basal level in the *InsP<sub>3</sub>* 5-phosphatase-injected cell. In the remaining injected cells (4 out of 13), the frequency of oscillations was strongly reduced (data not shown). In all cases, Ca<sup>2+</sup> oscillations in the two remaining responding cells appear uncoordinated (*n*=13 triplets). It is worth noting that *InsP<sub>3</sub>* 5-phosphatase did not inhibit gap-junction permeability because, when fura2 was co-injected

with 5-phosphatase into the intermediate cells of the triplets, the dye diffused into the two adjacent connected cells and again, no coordination was observed in the two remaining responding cells ( $n=3$ , data not shown).

Thus, it can be concluded that, if the level of  $\text{InsP}_3$  is too low in the intermediate cell, coordination cannot be achieved between the two end cells of the triplet. It could be argued that such an absence of coordination is simply due to the fact that the  $\text{Ca}^{2+}$  increases cannot propagate through the intermediate cell in the absence of an effective  $\text{InsP}_3$ -sensitive  $\text{Ca}^{2+}$ -induced  $\text{Ca}^{2+}$  release; in other words, as diffusion of  $\text{Ca}^{2+}$  is very slow, the increase of  $\text{Ca}^{2+}$  occurring in the first cell of the triplet could not be detected by the last one in the absence of any regenerative process. That this is not the case is clearly visible in the last panel of Fig. 7, which shows  $\text{Ca}^{2+}$  oscillations in the three cells of the same triplet at  $1 \mu\text{M}$  noradrenaline. There, owing to the high level of stimulation, the concentration of  $\text{InsP}_3$  is clearly sufficient to activate the  $\text{InsP}_3\text{Rs}$  even in the 5-phosphatase-injected cell (Fig. 7, right panel). However, even in this case, the  $\text{Ca}^{2+}$  oscillations remained uncoordinated among the three cells of the triplet. Thus, the absence of coordination in the  $\text{Ca}^{2+}$  oscillations in the  $\text{InsP}_3$  5-phosphatase-injected cells can be explained only by a difference in the levels of  $\text{InsP}_3$  between the connected cells, which cannot be erased by the low permeability of the gap junctions. Moreover, the latter experiment indicates that the intermediate cell had not been damaged during the 5-phosphatase microinjection process. It also gives an idea of the efficiency of the  $\text{InsP}_3$  5-phosphatase to metabolize  $\text{InsP}_3$ . Indeed,  $\text{Ca}^{2+}$  oscillations such as those seen in the intermediate cell are usually observed at 10 time lower agonist concentrations (see Fig. 7, left panel; Fig. 5; Fig. 6).

To summarize, there is no coordination of  $\text{Ca}^{2+}$  oscillations when the production of  $\text{InsP}_3$  is too low, that is, in the presence of low concentrations of agonist or when  $\text{InsP}_3$  is rapidly metabolized (by  $\text{InsP}_3$  5-phosphatase). By contrast, coordination can be achieved either by increasing the  $\text{InsP}_3$  concentration (via a rise in agonist concentration) or by increasing the affinity of the  $\text{InsP}_3$  receptor for  $\text{InsP}_3$ , even at a very low levels of stimulation.

In conclusion, we have shown that in doublets of hepatocytes connected by gap junctions, a high and sustained increase in  $[\text{Ca}^{2+}]_i$  does not induce any detectable  $[\text{Ca}^{2+}]_i$  rise in the adjacent cells, although gap junctions are fully operable. Similar results have been obtained in other cell types (Demer et al., 1993; Yule et al., 1996; reviewed by Sanderson et al., 1994) and are in agreement with the poor ability of  $\text{Ca}^{2+}$  to diffuse over a long distance (Albritton et al., 1992). However, because  $\text{Ca}^{2+}$  is known to be the principal regulator of its own release through an increase in the effect of  $\text{InsP}_3$  on its receptor (reviewed by Taylor, 1998), it has been suggested in other cell types, such as aortic endothelial cells, pancreatic acinar cells or articular chondrocytes, that the diffusion of small amounts of  $\text{Ca}^{2+}$  between adjacent cells could serve to sensitize  $\text{InsP}_3\text{R}$  in the neighboring cells and thus allow for the intercellular propagation of the signal (Yule et al., 1996; D'Andrea and Vittur, 1997; reviewed by Tordjmann et al., 2000).

Our results in hepatocytes cannot exclude any role for  $\text{Ca}^{2+}$  in the coordination of  $\text{Ca}^{2+}$  spiking in this cell type. It remains plausible that diffusion of  $\text{Ca}^{2+}$  might play a role when the  $\text{Ca}^{2+}$  sequestration mechanism is partly impaired (i.e. at high levels

of  $\text{InsP}_3$ ). In this case, intercellular diffusion of  $\text{Ca}^{2+}$  could smooth out the differences in  $\text{Ca}^{2+}$  signals among connected cells caused by possible heterogeneities in cell shape or in the diverse  $\text{InsP}_3$ -independent fluxes (Höfer, 1999). Our results show however, that even if such  $\text{Ca}^{2+}$ -activated  $\text{Ca}^{2+}$  release through  $\text{InsP}_3\text{R}$  takes place in hepatocytes (Taylor, 1998), it is not crucial for the coordination of  $\text{Ca}^{2+}$  oscillations induced by  $\text{InsP}_3$ -dependent agonists among connected cells. By contrast, coordination of  $\text{Ca}^{2+}$  oscillations among connected hepatocytes is fully dependent on the level of  $\text{InsP}_3$  diffusing from cell to cell.

We thank C. Cruttwell for helpful discussion and for her help in editing the manuscript and C. Klein for excellent technical assistance. Our work is supported by the Association pour la Recherche sur le Cancer (ARC 5457), by a CFB-France exchange program (Tournesol) and by the Communauté française de Belgique – Actions de Recherche Concertées (to C. E.).

## REFERENCES

- Allbritton, N. L., Meyer, T. and Stryer, L. (1992). Range of messenger action of calcium ion and inositol 1,4,5-trisphosphate. *Science* **258**, 1812-1815.
- Bird, G. S., Burgess, G. M. and Putney, J. W., Jr (1993). Sulfhydryl reagents and cAMP-dependent kinase increase the sensitivity of the inositol 1,4,5-trisphosphate receptor in hepatocytes. *J. Biol. Chem.* **268**, 17917-17923.
- Burgess, G. M., Bird, G. S., Obie, J. F. and Putney, J. W., Jr (1991). The mechanism for synergism between phospholipase C- and adenylcyclase-linked hormones in liver. Cyclic AMP-dependent kinase augments inositol trisphosphate-mediated  $\text{Ca}^{2+}$  mobilization without increasing the cellular levels of inositol polyphosphates. *J. Biol. Chem.* **266**, 4772-4781.
- Burghardt, R. C., Barhoumi, R., Sewall, T. C. and Bowen, J. A. (1995). Cyclic AMP induces rapid increases in gap junction permeability and changes in the cellular distribution of connexin43. *J. Membr. Biol.* **148**, 243-253.
- Chanson, M., Mollard, P., Meda, P., Suter, S. and Jongsma, H. J. (1999). Modulation of pancreatic acinar cell to cell coupling during ACh-evoked changes in cytosolic  $\text{Ca}^{2+}$ . *J. Biol. Chem.* **274**, 282-287.
- Combettes, L., Tran, D., Tordjmann, T., Laurent, M., Berthon, B. and Claret, M. (1994).  $\text{Ca}^{2+}$ -mobilizing hormones induce sequentially ordered  $\text{Ca}^{2+}$  signals in multicellular systems of rat hepatocytes. *Biochem. J.* **304**, 585-594.
- Communi, D., Lecocq, R. and Erneux, C. (1996). Arginine 343 and 350 are two active residues involved in substrate binding by human Type I D-myoinositol 1,4,5,-trisphosphate 5-phosphatase. *J. Biol. Chem.* **271**, 11676-11683.
- Cullen, P. J., Comerford, J. G. and Dawson, A. P. (1988). Heparin inhibits the inositol 1,4,5-trisphosphate-induced  $\text{Ca}^{2+}$  release from rat liver microsomes. *FEBS Lett.* **228**, 57-60.
- D'Andrea, P. and Vittur, F. (1997). Propagation of intercellular  $\text{Ca}^{2+}$  waves in mechanically stimulated articular chondrocytes. *FEBS Lett.* **400**, 58-64.
- Dani, J. W., Chernjavsky, A. and Smith, S. J. (1992). Neuronal activity triggers calcium waves in hippocampal astrocyte networks. *Neuron*. **8**, 429-440.
- De Mello, W. C. (1994). Gap junctional communication in excitable tissues; the heart as a paradigm. *Prog. Biophys. Mol. Biol.* **61**, 1-35.
- Demer, L. L., Wortham, C., Dirksen, E. R. and Sanderson, M. J. (1993). Mechanical stimulation induces intercellular calcium signaling in bovine aortic endothelial cells. *Am. J. Physiol.* **264**, H2094-H2102.
- De Smedt, F., Missiaen, L., Parys, J. B., Vanweyenberg, V., De Smedt, H. and Erneux, C. (1997). Isoprenylated human brain type I inositol 1,4,5-trisphosphate 5-phosphatase controls  $\text{Ca}^{2+}$  oscillations induced by ATP in Chinese hamster ovary cells. *J. Biol. Chem.* **272**, 17367-17375.
- Dupont, G., Tordjmann, T., Clair, C., Swillens, S., Claret, M. and Combettes, L. (2000). Mechanism of receptor-oriented intercellular calcium waves propagation in hepatocytes. *FASEB J.* **14**, 279-289.
- Erneux, C., Lemos, M., Verjans, B., Vanderhaeghen, P., Delvaux, A. and



- Dumont, J. E. (1989). Soluble and particulate Ins(1,4,5)P<sub>3</sub>/Ins(1,3,4,5)P<sub>4</sub> 5-phosphatase in bovine brain. *Eur. J. Biochem.* **181**, 317-322.
- Eugenin, E. A., Gonzalez, H., Saez, C. G. and Saez, J. C. (1998). Gap junctional communication coordinates vasopressin-induced glycogenolysis in rat hepatocytes. *Am. J. Physiol.* **274**, G1109-G1116.
- Gautam, A., Ng, O. C. and Boyer, J. L. (1987). Isolated rat hepatocyte couplets in short-term culture: structural characteristics and plasma membrane reorganization. *Hepatology* **7**, 216-223.
- Graf, P., vom Dahl, S. and Sies, H. (1987). Sustained oscillations in extracellular calcium concentrations upon hormonal stimulation of perfused rat liver. *Biochem. J.* **241**, 933-936.
- Giaume, C. and McCarthy, K. D. (1996). Control of gap-junctional communication in astrocytic networks. *Trends Neurosci.* **19**, 319-325.
- Green, A. K., Cobbold, P. H. and Dixon, C. J. (1999). Thimerosal enhances agonist-specific differences between [Ca<sup>2+</sup>]<sub>i</sub> oscillations induced by phenylephrine and ATP in single rat hepatocytes. *Cell Calcium* **25**, 173-178.
- Hajnoczky, G., Gao, E., Nomura, T., Hoek, J. B. and Thomas, A. P. (1993). Multiple mechanisms by which protein kinase A potentiates inositol 1,4,5-trisphosphate-induced Ca<sup>2+</sup> mobilization in permeabilized hepatocytes. *Biochem. J.* **293**, 413-422.
- Hilly, M., Pietri-Rouxel, F., Coquil, J. F., Guy, M. and Mauger, J. P. (1993). Thiol reagents increase the affinity of the inositol 1,4,5-trisphosphate receptor. *J. Biol. Chem.* **268**, 16488-16494.
- Höfer, T. (1999). Model of intercellular calcium oscillations in hepatocytes: synchronization of heterogeneous cells. *Biophys. J.* **77**, 1244-1256.
- Jacobi, C., Leipziger, J., Nitschke, R., Ricken, S. and Greger, R. (1998). No evidence for cell-to-cell coupling in rat colonic crypts: studies with Lucifer Yellow and with photobleaching. *Pflugers Arch.* **436**, 83-89.
- Joseph, S. K. and Ryan, S. V. (1993). Phosphorylation of the inositol trisphosphate receptor in isolated rat hepatocytes. *J. Biol. Chem.* **268**, 23059-23065.
- Lazrak, A. and Peracchia, C. (1993). Gap junction gating sensitivity to physiological internal calcium regardless of pH in Novikoff hepatoma cells. *Biophys. J.* **65**, 2002-2012.
- Lindqvist, S. M., Sharp, P., Johnson, I., Satoh, Y. and Williams, M. (1998). Acetylcholine-induced calcium signaling along the rat colonic crypt axis. *Gastroenterology* **115**, 1131-1143.
- Loewenstein, W. R. (1981). Junctional intercellular communication: the cell-to-cell membrane channel. *Physiol. Rev.* **61**, 829-913.
- Loewenstein, W. R. (1985). Regulation of cell-to-cell communication by phosphorylation. *Biochem. Soc. Symp.* **50**, 43-58.
- Meyvis, T. K., De Smedt, S. C., Van Oostveldt, P. and Demeester, J. (1999). Fluorescence recovery after photobleaching: a versatile tool for mobility and interaction measurements in pharmaceutical research. *Pharm Res.* **16**, 1153-1162.
- Missiaen, L., Taylor, C. W. and Berridge, M. J. (1992). Luminal Ca<sup>2+</sup> promoting spontaneous Ca<sup>2+</sup> release from inositol trisphosphate-sensitive stores in rat hepatocytes. *J. Physiol.* **455**, 623-640.
- Motoyama, K., Karl, I. E., Flye, M. W., Osborne, D. F. and Hotchkiss, R. S. (1999). Effect of Ca<sup>2+</sup> agonists in the perfused liver: determination via laser scanning confocal microscopy. *Am. J. Physiol.* **276**, R575-R585.
- Nathanson, M. H. and Burgstahler, A. D. (1992). Coordination of hormone-induced calcium signals in isolated rat hepatocyte couplets – Demonstration with confocal microscopy. *Mol. Biol. Cell* **3**, 113-121.
- Nathanson, M. H., Burgstahler, A. D., Mennone, A., Fallon, M. B., Gonzalez, C. B. and Saez, J. C. (1995). Ca<sup>2+</sup> waves are organized among hepatocytes in the intact organ. *Am. J. Physiol.* **32**, G167-G171.
- Newman, E. A. and Zahs, K. R. (1997). Calcium waves in retinal glial cells. *Science* **275**, 844-847.
- Ngezahayo, A. and Kolb, H. A. (1993). Gap junctional conductance tunes phase difference of cholecystokinin evoked calcium oscillations in pairs of pancreatic acinar cells. *Pflugers Arch.* **422**, 413-415.
- Niessen, H. and Willecke, K. (2000). Strongly decreased gap junctional permeability to inositol 1,4,5-trisphosphate in connexin32 deficient hepatocytes. *FEBS Lett.* **466**, 112-114.
- Patel, S., Robb-Gaspers, L. D., Stellato, K. A., Shon, M. and Thomas, A. P. (1999). Coordination of calcium signalling by endothelial-derived nitric oxide in the intact liver. *Nat. Cell Biol.* **1**, 467-471.
- Putney, J. W. Jr, Takemura, H., Hughes, A. R., Horstman, D. A. and Thastrup, O. (1989). How do inositol phosphates regulate calcium signaling? *FASEB J.* **3**, 1899-1905.
- Robb-Gaspers, L. D. and Thomas, A. P. (1995). Coordination of Ca<sup>2+</sup> signaling by intercellular propagation of Ca<sup>2+</sup> waves in the intact liver. *J. Biol. Chem.* **270**, 8102-8107.
- Rooney, T. A., Sass, E. J. and Thomas, A. P. (1990). Agonist-induced cytosolic calcium oscillations originate from a specific locus in single hepatocytes. *J. Biol. Chem.* **265**, 10792-10796.
- Saez, J. C., Connor, J. A., Spray, D. C. and Bennett, M. V. L. (1989). Hepatocyte gap junctions are permeable to the 2<sup>nd</sup> messenger, inositol 1,4,5-trisphosphate, and to calcium ions. *Proc. Natl. Acad. Sci. USA* **86**, 2708-2712.
- Sanderson, M. J., Charles, A. C., Boitano, S., Dirksen, E. R. (1994). Mechanisms and functions of intercellular calcium signaling. *Mol. Cell. Endocrinol.* **98**, 173-187.
- Sanderson, M. J. (1995). Intercellular calcium waves mediated by inositol trisphosphate. *Ciba Found. Symp.* **188**, 175-189.
- Schlösser, S. F., Burgstahler, A. D. and Nathanson, M. H. (1996). Isolated rat hepatocytes can signal to other hepatocytes and bile duct cells by release of nucleotides. *Proc. Natl. Acad. Sci. USA* **93**, 9948-9953.
- Sneyd, J., Keizer, J. and Sanderson, M. J. (1995). Mechanisms of calcium oscillations and waves: a quantitative analysis. *FASEB J.* **9**, 1463-1472.
- Spray, D. C., Saez, J. C., Hertzberg, E. L. and Dermietzel, R. (1994). Gap junctions in liver. In *The liver: biology and pathobiology* (ed. I. M. Arias, J. L. Boyer, N. Fausto, W. B. Jokoby, D. A. Schachter, D. A. Shafritz), pp. 951-967. New York: Raven Press.
- Stelling, J. W. and Jacob, T. J. (1997). Functional coupling in bovine ciliary epithelial cells is modulated by carbachol. *Am. J. Physiol.* **273**, C1876-C1881.
- Taylor, C. W. (1998). Inositol trisphosphate receptors: Ca<sup>2+</sup> modulated intracellular Ca<sup>2+</sup> channels. *Biochim. Biophys. Acta.* **1436**, 19-33.
- Thomas, A. P., Renard, D. C. and Rooney, T. A. (1991). Spatial and temporal organization of calcium signalling in hepatocytes. *Cell Calcium.* **12**, 111-126.
- Thomas, A. P., Bird, G. S., Hajnoczky, G., Robb-Gaspers, L. D. and Putney, J. W. Jr (1996). Spatial and temporal aspects of cellular calcium signaling. *FASEB J.* **10**, 1505-1517.
- Tomasetto, C., Neveu, M. J., Daley, J., Horan, P. K. and Sager, R. (1993). Specificity of gap junction communication among human mammary cells and connexin transfectants in culture. *J. Cell Biol.* **122**, 157-167.
- Tordjmann, T., Berthon, B., Claret, M. and Combettes, L. (1997). Coordinated intercellular calcium waves induced by noradrenaline in rat hepatocytes: dual control by gap junction permeability and agonist. *EMBO J.* **16**, 5398-5407.
- Tordjmann, T., Clair, C., Claret, M. and Combettes, L. (2000). Intercellular Calcium Signaling In 'Non-Excitable' Cells. In *Calcium: The Molecular Basis of Calcium Action in Biology and Medicine*. (ed. R. Pochet), pp. 95-108. Dordrecht: Kluwer.
- Verjans, B., Moreau, C., Erneux, C. (1994). The control of intracellular signal molecules at the level of their hydrolysis: the example of inositol 1,4,5-trisphosphate 5-phosphatase. *Mol. Cell. Endocrinol.* **98**, 167-171.
- Wade, M. H., Trosko, J. E. and Schindler, M. (1986). A fluorescence photobleaching assay of gap junction-mediated communication between human cells. *Science.* **232**, 525-528.
- Wojcikiewicz, R. J. and Luo, S. G. (1998). Phosphorylation of inositol 1,4,5-trisphosphate receptors by cAMP-dependent protein kinase. Type I, II, and III receptors are differentially susceptible to phosphorylation and are phosphorylated in intact cells. *J. Biol. Chem.*, **273**, 5670-5677.
- Woods, N. M., Cuthbertson, K. S. R. and Cobbold, P. H. (1986). Repetitive transient rises in cytoplasmic free calcium in hormone-stimulated hepatocytes. *Nature* **319**, 600-602.
- Worley, P. F., Baraban, J. M., Supattapone, S., Wilson, V. S. and Snyder, S. H. (1987). Characterization of inositol trisphosphate receptor binding in brain. *J. Biol. Chem.* **262**, 12132-12136.
- Yule, D. I., Stuenkel, E. and Williams, A. (1996). Intercellular calcium waves in rat pancreatic acini: mechanism of transmission. *Am. J. Physiol.* **271**, C1285-C1294.
